# Supplementary material for: The effect of a reciprocal peat transplant between two contrasting Central European sites on C cycling and C isotope ratios
Source: Copernicus journal article supplement (doi:10.5194/bg-7-921-2010), 2010-03-08
Supplement: Supplementary file 1 [file bg-7-921-2010-supplement.pdf]

## Electronic Annex:

**Fig. A1.** Laboratory incubation of peat cores (n=3 per treatment) in month 18 following the peat transplant experiment. CO<sub>2</sub> emission rates.

**Fig. A2.** Laboratory incubation of peat cores (n=3 per treatment) in month 18 following the peat transplant experiment. CH<sub>4</sub> emission rates.

**Fig. A3.** Laboratory incubation of peat cores (n=3 per treatment) in month 18 following the peat transplant experiment.  $\delta^{13}\text{C-CO}_2$ .

**Fig. A4.** Laboratory incubation of peat cores (n=3 per treatment) in month 18 following the peat transplant experiment.  $\delta^{13}\text{C-CH}_4$ .

**Fig. A5.** Effect of the peat transplant on C concentration (means  $\pm$ SE, n=5). Asterisks denote statistically significant differences (p<0.05). Comparison of peat from the same site of origin is in each panel.

**Fig. A6.** Year vs. depth representation of peat accumulation. VJJ and CB (this study; black symbols) exhibited higher rates of peat accumulation compared to 5 sites in Europe (Novak et al., 2008; open circles), and 5 sites in the US (Wieder et al., 1994; chequered area).

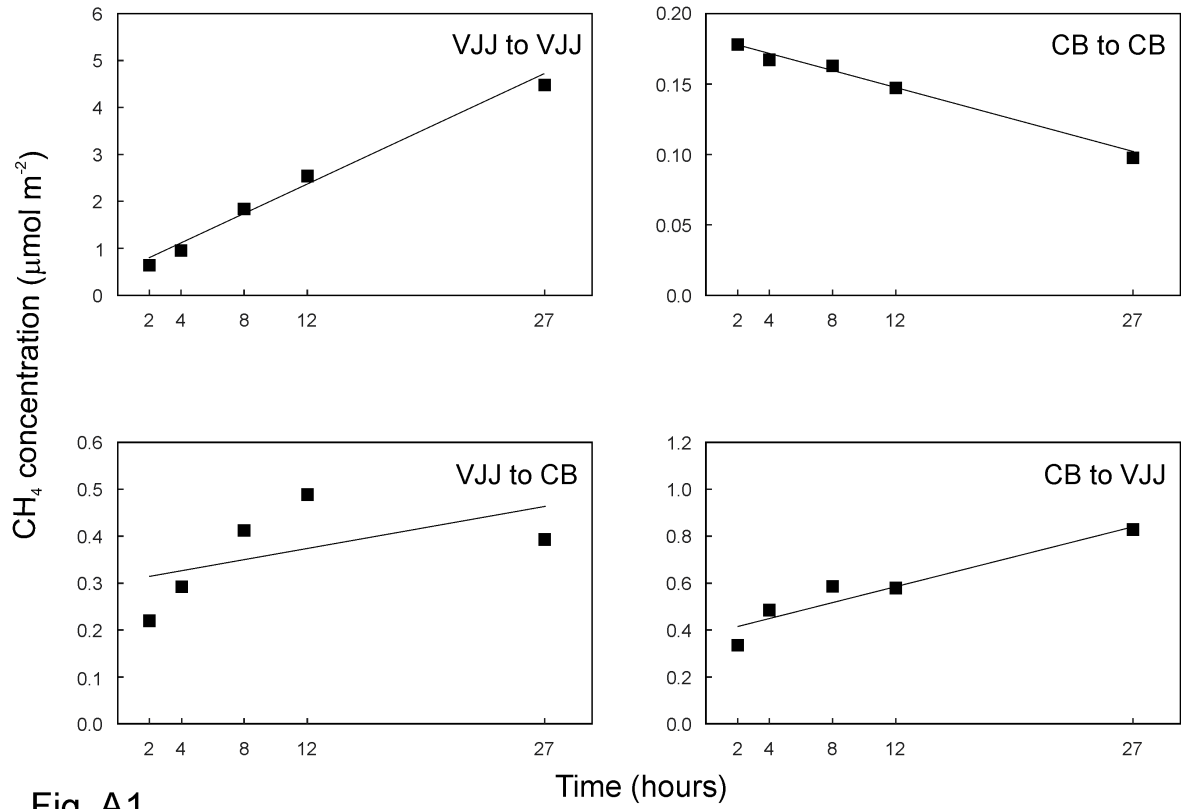

Fig. A1

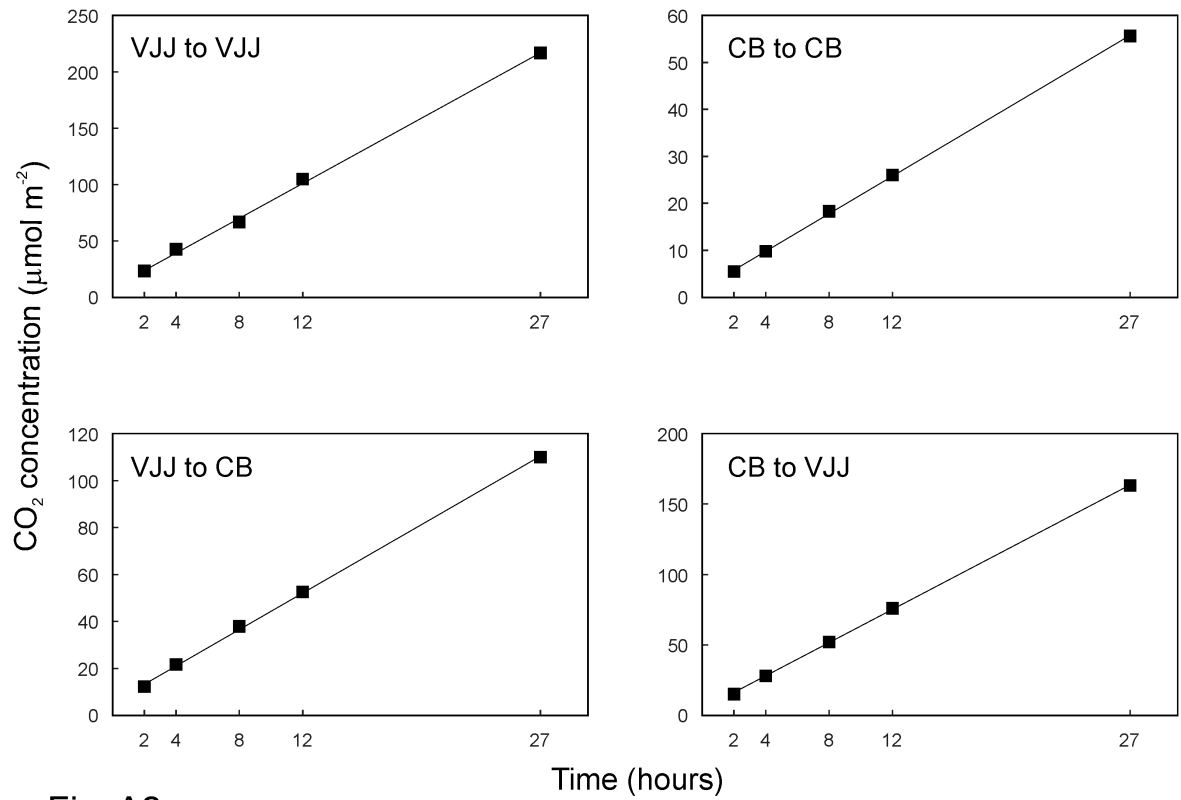

Fig. A2

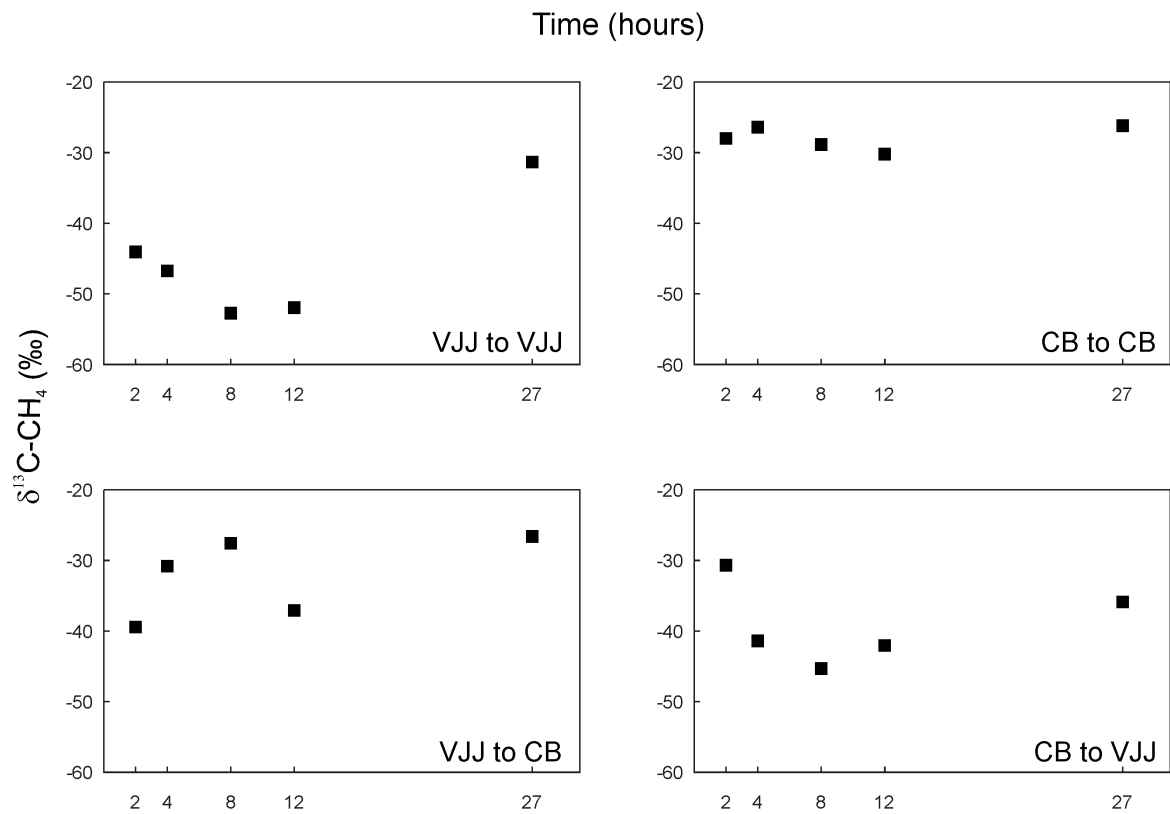

Fig. A3

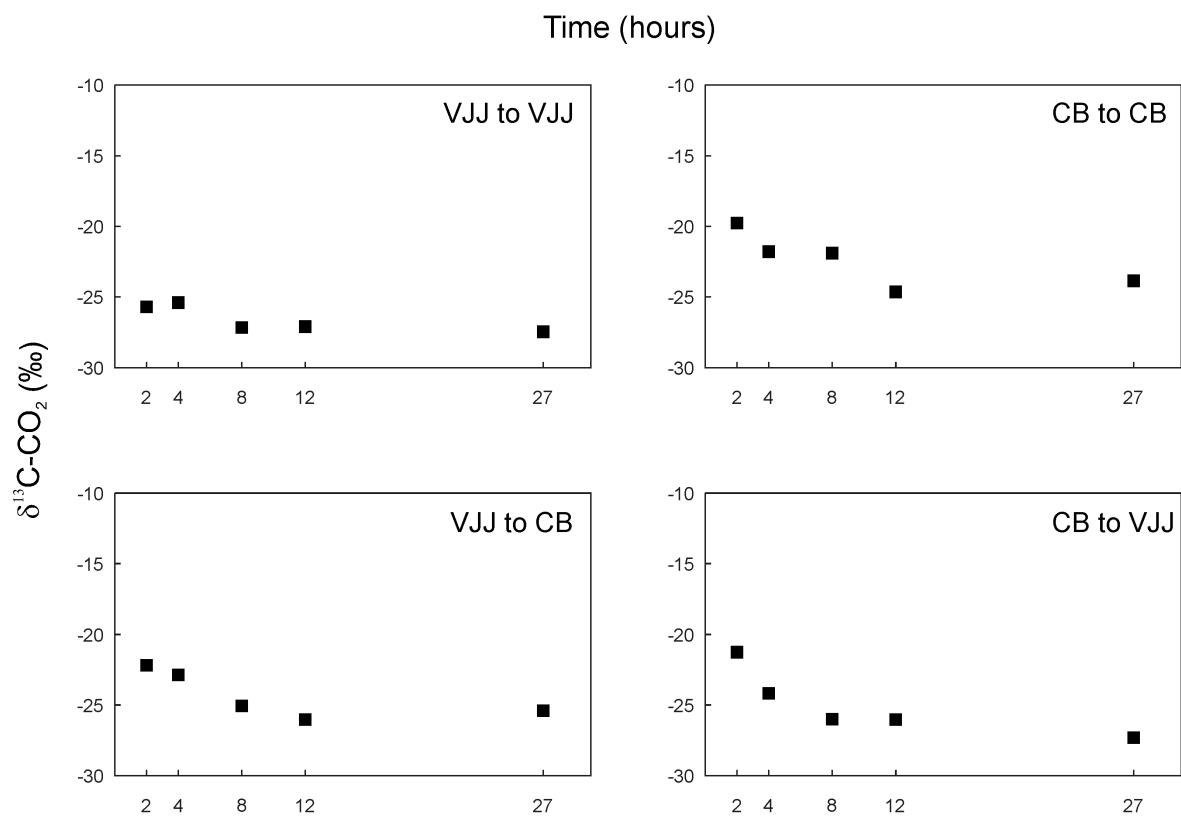

Fig. A4

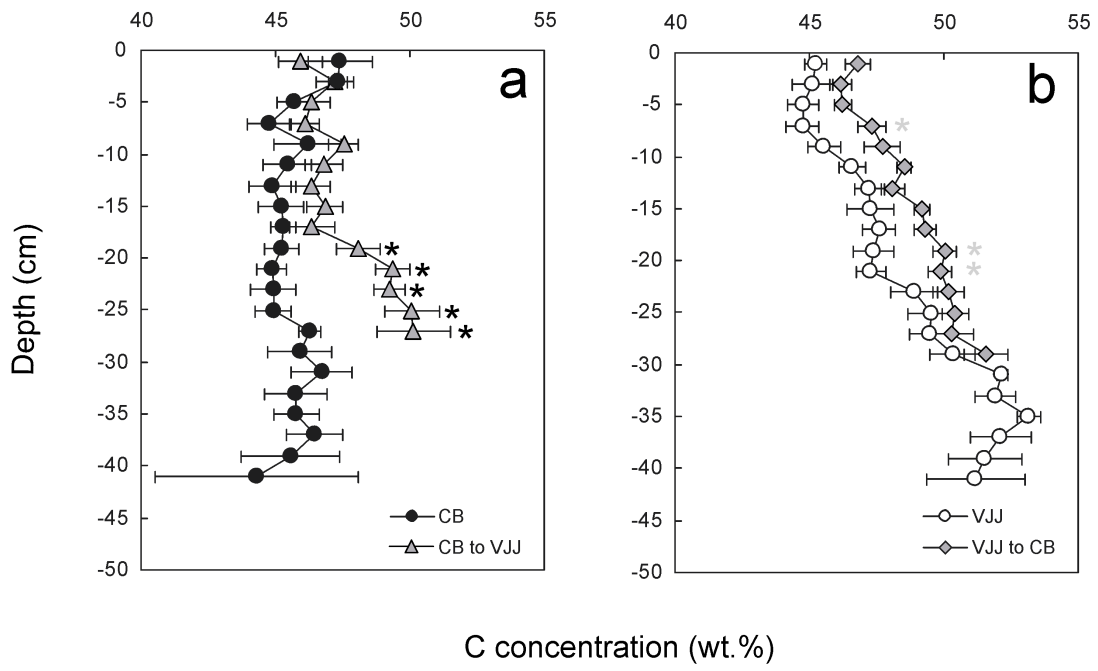

Fig. A5

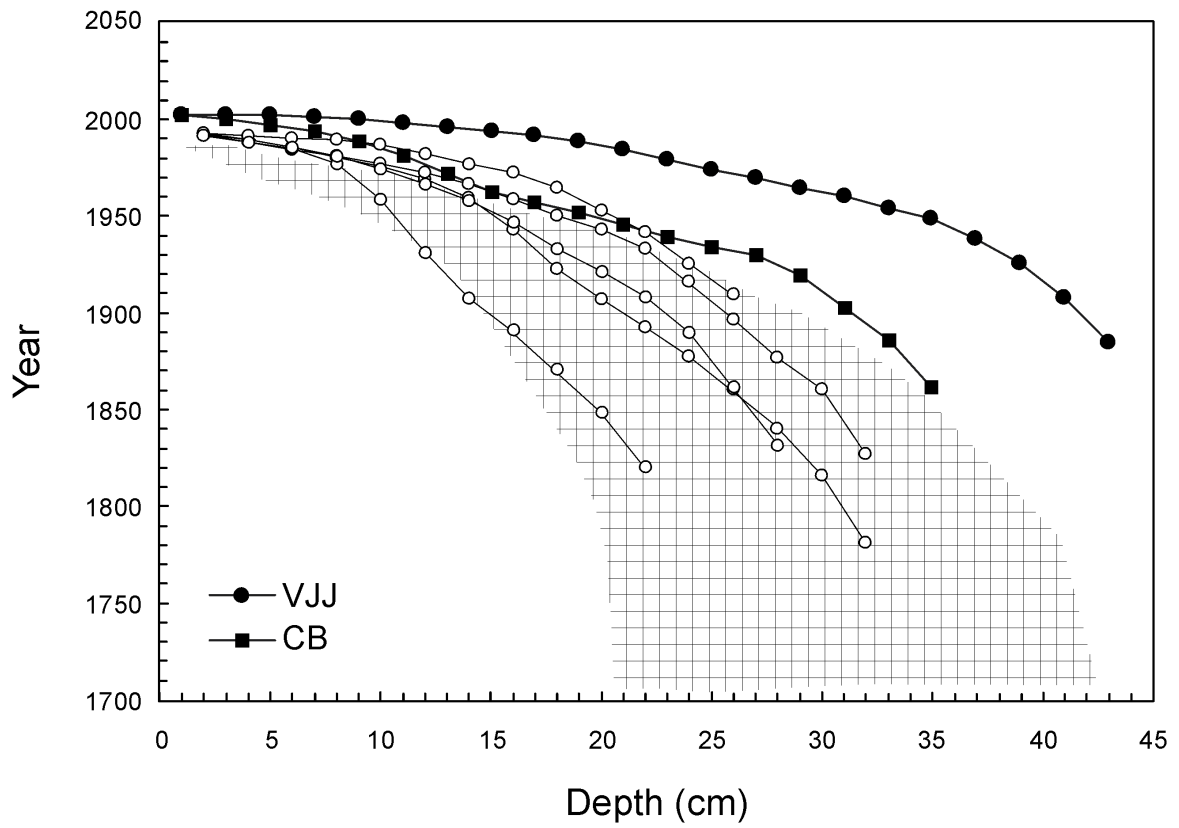

Fig. A6
